# Supplementary material
Source: PubMed Central journal article supplement (PMC5003151)
Supplement: 10.1194_M066910_jlr.M066910-1.pdf [file 10.1194_M066910_jlr.M066910-1.pdf]

**Pulmonary epithelial cancer cells, and their exosomes, metabolize myeloid cell derived leukotriene C<sub>4</sub> to leukotriene D<sub>4</sub>**

Supplement

JLR/2016/066910, revised

Ana Lukic<sup>1</sup>, Jie Ji<sup>2</sup>, Helena Idborg<sup>3</sup>, Bengt Samuelsson<sup>1</sup>, Lena Palmberg<sup>2</sup>, Susanne Gabrielsson<sup>4</sup>, and Olof Rådmark<sup>1</sup>

<sup>1</sup>Department of Medical Biochemistry and Biophysics, Division of Physiological Chemistry II

<sup>2</sup> Lung and Airway Research, Institute of Environmental Medicine

<sup>3</sup>Department of Medicine Solna, Rheumatology Unit

<sup>4</sup>Department of Medicine Solna, Unit of Translational Immunology

All at Karolinska Institutet, 171 77, Stockholm, Sweden

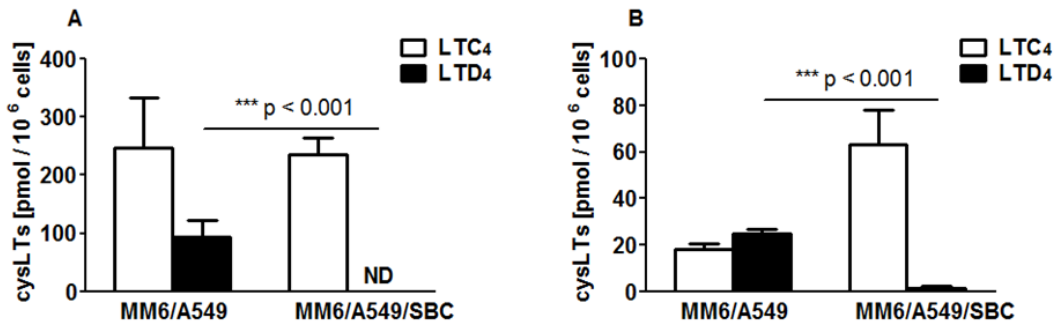

Fig. S1

**Supplemental Figure S1. The effect of serine borate complex (SBC, 10mM) on conversion of LTC<sub>4</sub> to LTD<sub>4</sub> (GGT activity) was determined in MM6/A549 coculturations.** A) Cocultures were pretreated with SBC for 10 minutes before incubation with LTA<sub>4</sub> (20μM, 5 min). Following extraction, CysLTs were analyzed by HPLC (n=3). B) Cocultures were pretreated with SBC for 5 minutes before additions of PMA (100nM, 10 min) followed by ionophore A23187 (5μM, 10 min). (n=7). Following extraction, CysLTs were analyzed by HPLC. The results are given as Mean ± SE, student's t-test. ND means not detected.

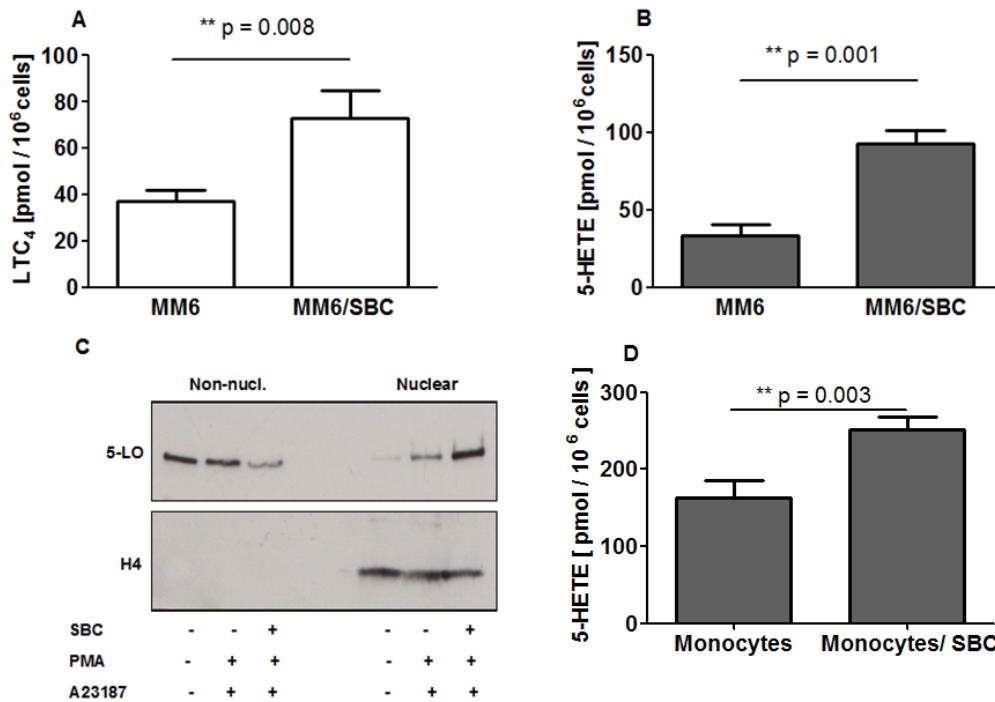

Fig. S2

**Supplemental Figure S2. The effect of serine borate complex (SBC, 10mM) on 5-LO activity and translocation in MM6 cells.** A-B) Differentiated MM6 cells were pretreated with SBC for 5 minutes before additions of PMA (100nM, 10 min) followed by ionophore A23187 (5 $\mu$ M, 10 min). Following extractions, LTC<sub>4</sub> (A) and 5HETE (B) were analyzed by HPLC (n=6), student's t-test. C) Translocation of 5-LO to the nuclear fraction. 4x10<sup>6</sup> cells were incubated as described above, and cytosolic and nuclear fractions were prepared, see Methods. Pair-wise samples of non-nuclear and nuclear fractions, corresponding to identical cell numbers, were loaded on SDS-PAGE and immunoblotting was performed for 5-LO and histone H4 (control for loading of nuclear fractions). Similar results were observed in three different experiments. D) Monocytes prepared from peripheral blood cells were pretreated with SBC for 5 minutes before additions of PMA (100nM, 10 min) followed by ionophore A23187 (5 $\mu$ M, 10 min). Following extractions 5-HETE was analyzed by HPLC. Cells from two donors were analyzed in duplicates. Student's t-test.

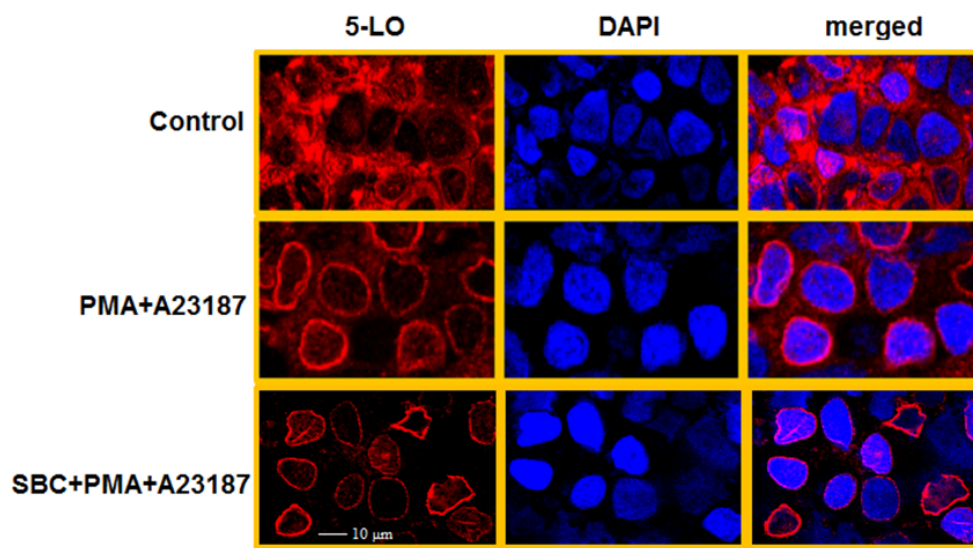

Fig. S3

**Supplemental Figure S3. Immunocytochemistry of 5-LO in MM6 cells.** Cells were incubated as described in legend to supplemental Figure S2. Immunofluorescence images (see methods) show single staining for 5LO (red, Cy3), nucleus (blue, DAPI) and merged pictures. Bar = 10μm. Similar data were obtained in two additional independent analyses.
